# Supplementary material for: Monolayer Ge2Te2P4 as a promising photocatalyst for solar driven water-splitting: a DFT study
Source: Royal Society of Chemistry journal article supplement (doi:10.1039/d3cp02978f), 2023-01-01
Supplement: d3cp02978f1.pdf [file d3cp02978f1.pdf]

## Supplementary Materials

# Monolayer $\text{Ge}_2\text{Te}_2\text{P}_4$ as promising photocatalyst for solar driven water-splitting: A DFT study

Pham D. Trung,<sup>\*a</sup> and Hien D. Tong<sup>\*\*b</sup>

### AFFILIATIONS

<sup>a</sup> Yersin University, 27 Ton That Tung, Ward 8, Dalat City, Lam Dong Province, Vietnam.

<sup>b</sup> Faculty of Engineering, Vietnamese-German University, Binh Duong, Vietnam.

Authors to whom correspondence should be addressed: [phdtrung2018@gmail.com](mailto:phdtrung2018@gmail.com) (P.D. Trung), [hien.td@vgu.edu.vn](mailto:hien.td@vgu.edu.vn) (H.D. Tong)

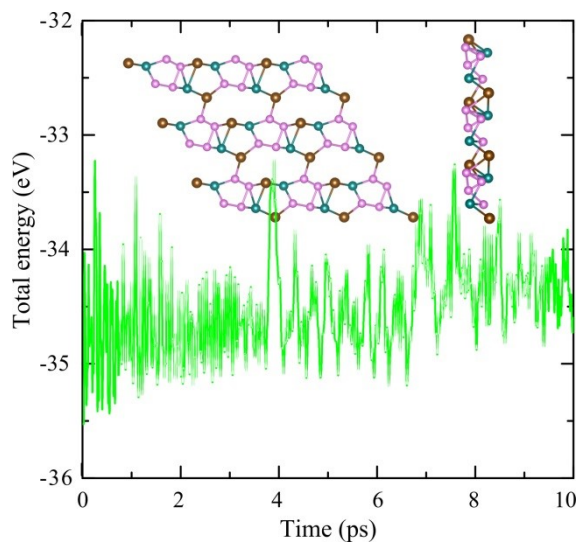

**Fig. S1.** The AIMD energy fluctuations at 900 K, and the snapshot of equilibrium structure of  $\text{Ge}_2\text{Te}_2\text{P}_4$  monolayer after 10 ps.

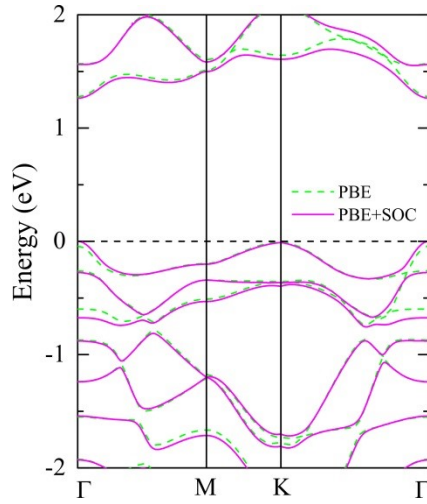

**Fig. S2.** The calculated electronic band structure of the  $\text{Ge}_2\text{Te}_2\text{P}_4$  monolayer with spin-orbital coupling (SOC) (pink), and without SOC (dash green curves) extracted from PBE functional.

**Table S1.** The calculated Gibbs free energy  $\Delta G_{\text{H}}$  via Grimme's D2 and D3 methods.

|         | Grimme's D2 | Grimme's D3 |
|---------|-------------|-------------|
| Te-site | -1.78 eV    | -1.86 eV    |
| Ge-site | -2.45 eV    | -2.54 eV    |
| P-site  | -2.61 eV    | -2.71 eV    |
